# Supplementary material
Source: PubMed Central journal article supplement (PMC5053900)
Supplement: NIHMS805991-supplement-Supp_info.pdf [file NIHMS805991-supplement-Supp_info.pdf]

## Supporting Information

**Table S1.** Theoretical and observed masses of SAMP and UbaA proteins<sup>a</sup>.

| Protein                                   | AVERAGE MASS (Da)  |                                      |                             |
|-------------------------------------------|--------------------|--------------------------------------|-----------------------------|
|                                           | <u>Theoretical</u> | ESI-MS                               | <u>Observed</u><br>SDS-PAGE |
| Flag-His <sub>6</sub> -SAMP1 <sup>b</sup> | 10,912.81          | 10,912.50 ± 0.35<br>11,088.23 ± 0.33 | ~14,500                     |
| Flag-His <sub>6</sub> -SAMP1ΔGG           | 10,798.70          | 10,798.34 ± 0.11<br>10,986.36 ± 0.08 | ~12,000                     |
| Flag-His <sub>6</sub> -SAMP2 <sup>b</sup> | 9,093.92           | 9,093.34 ± 0.25<br>9,191.43 ± 0.38   | ~18,000<br>~16,000          |
| Flag-His <sub>6</sub> -SAMP3              | 12,153.44          | 12,153.07 ± 0.11                     | ~15,500                     |
| His <sub>6</sub> -UbaA                    | 30,848.03          | 30,776.40 <sup>c</sup>               | ~35,000                     |

<sup>a</sup>SAMPs and UbaA were purified from recombinant *E. coli* and *Hfx. volcanii* HM1052, respectively, and analyzed by ESI-MS and reducing SDS-PAGE. <sup>b</sup>Masses of 11,010.31 ± 0.30 Da and 9,180.49 ± 0.20 Da were detected by ESI-MS at peak heights of >10-fold less than the major peaks observed for Flag-His-SAMP1 and Flag-His<sub>6</sub>-SAMP2, respectively. <sup>c</sup>Mass corresponds to theoretical mass of His<sub>6</sub>-UbaA with N-terminal Met cleaved and associated with 2 Na<sup>+</sup> adducts. Accurate mass of protein samples was determined by electrospray ionization time-of-flight mass spectrometry (ESI-TOF). Purified recombinant proteins were desalted by triple dialysis against 20 mM ammonium acetate in water. Samples were treated with acetonitrile (50% v/v) and formic acid (1% v/v) and loaded into an AB Sciex QSTAR XL quadrupole (Q) TOF MS equipped with a nanoelectrospray source (Protana XYZ manipulator). Concentrates of proteins (200 μl) were also pre-treated with 5 μl formic acid (1% v/v) and loaded into an Agilent 6210 time-of-flight mass spectrometer (Agilent Technologies, Inc., Santa Clara, CA) with a nanoelectrospray ionization source electrospray in positive mode. Mass Hunter software (Agilent Technologies, Inc., Santa Clara, CA) was used for analysis.

**Table S2.** List of strains and plasmids used in this study<sup>a</sup>.

| Strain, plasmid or primer | Description                                                                                                                                                                                          | Source or reference |
|---------------------------|------------------------------------------------------------------------------------------------------------------------------------------------------------------------------------------------------|---------------------|
| <b>Strains:</b>           |                                                                                                                                                                                                      |                     |
| <i>E. coli</i>            |                                                                                                                                                                                                      |                     |
| Top10                     | F <sup>-</sup> <i>recA1 endA1 hsdR17</i> (r <sub>K</sub> <sup>-</sup> m <sub>K</sub> <sup>+</sup> ) <i>supE44 thi-1 gyrA relA1</i>                                                                   | Invitrogen          |
| GM2163                    | F <sup>-</sup> <i>ara-14 leuB6 fhuA31 lacY1 tsx78 glnV44 galk2 galT22 mcrA dcm-6 hisG4 rfbD1 rpsL136 dam13::Tn9 xylA5 mtl-1 thi-1 mcrB1 hsdR2</i>                                                    | New England Biolabs |
| Rosetta (DE3)             | F- <i>ompT hsdSB</i> (rB- mB-) <i>gal dcm</i> (DE3) <i>pRARE</i> (Cmr)                                                                                                                               | Novagen             |
| XL-1 Blue                 | <i>recA1 endA1 gyrA96 thi-1 hsdR17 supE44 relA1 lac</i> , F' <i>proAB lacIqZΔM15 Tn10 Tet<sup>r</sup></i>                                                                                            | Stratagene          |
| XL10-Gold                 | Tet <sup>r</sup> Δ( <i>mcrA</i> )183 Δ( <i>mcrCB-hsdSMR-mrr</i> )173 <i>endA1 supE44 thi-1 recA1 gyrA96 relA1 lac Hte</i> [F' <i>proAB lacIqZΔM15 Tn10</i> (Tet <sup>r</sup> ) Amy Cm <sup>r</sup> ] | Stratagene          |
| <i>H. volcanii</i>        |                                                                                                                                                                                                      |                     |
| DS2                       | Dead Sea isolate                                                                                                                                                                                     | [1]                 |
| DS70                      | DS2 cured of plasmid pHV2                                                                                                                                                                            | [2]                 |
| H26                       | DS70 <i>pyrE2</i>                                                                                                                                                                                    | [3]                 |
| HM1052                    | H26 <i>ubaA</i>                                                                                                                                                                                      | [4]                 |
| HM1096                    | H26 <i>samp1 samp2 samp3</i>                                                                                                                                                                         | [4]                 |
| NH02                      | H26 <i>ubaA samp1 samp2 samp3</i> (HM1096 <i>ubaA</i> )                                                                                                                                              | This study          |
| <b>Plasmids:</b>          |                                                                                                                                                                                                      |                     |
| pET15b                    | Ap <sup>r</sup> ; expression vector                                                                                                                                                                  | Novagen             |
| pET24b                    | Km <sup>r</sup> ; expression vector                                                                                                                                                                  | Novagen             |
| pJAM809                   | Ap <sup>r</sup> Nv <sup>r</sup> ; pJAM202 containing P <sub>2<sub>rrnA</sub></sub> - <i>hvo1862-strepll</i> ( <i>KpnI</i> site upstream of <i>Strepll</i> coding sequence)                           | [5]                 |
| pJAM202c                  | Ap <sup>r</sup> Nv <sup>r</sup> ; expression vector                                                                                                                                                  | [6]                 |
| pJAM957                   | Ap <sup>r</sup> Nv <sup>r</sup> ; pJAM202 P <sub>2<sub>rrnA</sub></sub> - <i>hvo_0558-strepll</i> ( <i>UbaA-Strepll</i> )                                                                            | [4]                 |
| pJAM1209                  | Ap <sup>r</sup> Nv <sup>r</sup> ; P <sub>2<sub>rrn</sub></sub> -His <sub>6</sub> -thrombin cleavage site- <i>hvo_0558</i> (His <sub>6</sub> - <i>UbaA</i> )                                          | This study          |
| pJAM1214-35a              | Ap <sup>r</sup> Nv <sup>r</sup> ; pET15b P <sub>T7</sub> -His <sub>6</sub> -thrombin cleavage site- <i>hvo_0558</i> (His <sub>6</sub> - <i>UbaA</i> )                                                | This study          |
| pJAM1131                  | Km <sup>r</sup> ; pET24b P <sub>T7</sub> -Flag-His <sub>6</sub> - <i>hvo_2619</i> (Flag-His <sub>6</sub> -SAMP1)                                                                                     | [7]                 |
| pJAM1174                  | Km <sup>r</sup> ; pET24b P <sub>T7</sub> -Flag-His <sub>6</sub> - <i>hvo_2619</i> (Flag-His <sub>6</sub> -SAMP1ΔGG)                                                                                  | This study          |
| pJAM1132                  | Km <sup>r</sup> ; pET24b P <sub>T7</sub> -Flag-His <sub>6</sub> - <i>hvo_0202</i> (Flag-His <sub>6</sub> -SAMP2)                                                                                     | This study          |
| pJAM1175                  | Km <sup>r</sup> ; pET24b P <sub>T7</sub> -Flag-His <sub>6</sub> - <i>hvo_0202</i> (Flag-His <sub>6</sub> -SAMP2ΔGG)                                                                                  | This study          |
| pJAM1196                  | Km <sup>r</sup> ; pET24b P <sub>T7</sub> -Flag-His <sub>6</sub> - <i>hvo_2177</i> (Flag-His <sub>6</sub> -SAMP3)                                                                                     | This study          |
| pJAM 2704                 | Km <sup>r</sup> ; pET24b P <sub>T7</sub> -Flag-His <sub>6</sub> - <i>hvo_2177</i> (Flag-His <sub>6</sub> -SAMP3ΔGG)                                                                                  | This study          |

|          |                                                                                                                                     |            |
|----------|-------------------------------------------------------------------------------------------------------------------------------------|------------|
| pJAM1860 | Ap <sup>f</sup> ; Nv <sup>f</sup> ; pJAM202c P2 <sub>rm</sub> -hvo_0558 G39,41A - <i>Strepll</i> (UbaA G39A,G41A - <i>Strepll</i> ) | This study |
| pJAM1849 | Ap <sup>f</sup> ; Nv <sup>f</sup> ; pJAM202c P2 <sub>rm</sub> -hvo_0558 G42A - <i>Strepll</i> (UbaA G42A - <i>Strepll</i> )         | This study |
| pJAM1844 | Ap <sup>f</sup> ; Nv <sup>f</sup> ; pJAM202c P2 <sub>rm</sub> -hvo_0558 D63N - <i>Strepll</i> (UbaA D63N - <i>Strepll</i> )         | This study |
| pJAM1837 | Ap <sup>f</sup> ; Nv <sup>f</sup> ; pJAM202c P2 <sub>rm</sub> -hvo_0558 D65N - <i>Strepll</i> (UbaA D65N - <i>Strepll</i> )         | This study |
| pJAM1855 | Ap <sup>f</sup> ; Nv <sup>f</sup> ; pJAM202c P2 <sub>rm</sub> -hvo_0558 S70A - <i>Strepll</i> (UbaA S70A - <i>Strepll</i> )         | This study |
| pJAM1861 | Ap <sup>f</sup> ; Nv <sup>f</sup> ; pJAM202c P2 <sub>rm</sub> -hvo_0558 L72P - <i>Strepll</i> (UbaA L72P - <i>Strepll</i> )         | This study |
| pJAM1862 | Ap <sup>f</sup> ; Nv <sup>f</sup> ; pJAM202c P2 <sub>rm</sub> -hvo_0558 R74Q - <i>Strepll</i> (UbaA R74Q - <i>Strepll</i> )         | This study |
| pJAM1124 | Ap <sup>f</sup> ; Nv <sup>f</sup> ; pJAM202c P2 <sub>rm</sub> -hvo_0558 K87R - <i>Strepll</i> (UbaA K87R - <i>Strepll</i> )         | This study |
| pJAM1708 | Ap <sup>f</sup> ; Nv <sup>f</sup> ; pJAM202c P2 <sub>rm</sub> -hvo_0558 D131N - <i>Strepll</i> (UbaA D131N - <i>Strepll</i> )       | This study |
| pJAM1121 | Ap <sup>f</sup> ; Nv <sup>f</sup> ; pJAM202c P2 <sub>rm</sub> -hvo_0558 R136A - <i>Strepll</i> (UbaA R136A - <i>Strepll</i> )       | This study |
| pJAM1127 | Ap <sup>f</sup> ; Nv <sup>f</sup> ; pJAM202c P2 <sub>rm</sub> -hvo_0558 C171S - <i>Strepll</i> (UbaA C171S - <i>Strepll</i> )       | This study |
| pJAM1123 | Ap <sup>f</sup> ; Nv <sup>f</sup> ; pJAM202c P2 <sub>rm</sub> -hvo_0558 C174S - <i>Strepll</i> (UbaA C174S - <i>Strepll</i> )       | This study |
| pJAM1116 | Ap <sup>f</sup> ; Nv <sup>f</sup> ; pJAM202c P2 <sub>rm</sub> -hvo_0558 C188S - <i>Strepll</i> (UbaA C188S - <i>Strepll</i> )       | [4]        |
| pJAM1700 | Ap <sup>f</sup> ; Nv <sup>f</sup> ; pJAM202c P2 <sub>rm</sub> -hvo_0558 C188A - <i>Strepll</i> (UbaA C188A - <i>Strepll</i> )       | This study |
| pJAM1126 | Ap <sup>f</sup> ; Nv <sup>f</sup> ; pJAM202c P2 <sub>rm</sub> -hvo_0558 C203S - <i>Strepll</i> (UbaA C203S - <i>Strepll</i> )       | This study |
| pJAM1707 | Ap <sup>f</sup> ; Nv <sup>f</sup> ; pJAM202c P2 <sub>rm</sub> -hvo_0558 C245S - <i>Strepll</i> (UbaA C245S - <i>Strepll</i> )       | This study |
| pJAM1706 | Ap <sup>f</sup> ; Nv <sup>f</sup> ; pJAM202c P2 <sub>rm</sub> -hvo_0558 C248S - <i>Strepll</i> (UbaA C248S - <i>Strepll</i> )       | This study |
| pJAM1701 | Ap <sup>f</sup> ; Nv <sup>f</sup> ; pJAM202c P2 <sub>rm</sub> -hvo_0558 C265S - <i>Strepll</i> (UbaA C265S - <i>Strepll</i> )       | This study |
| pJAM993  | Ap <sup>f</sup> ; Nv <sup>f</sup> ; pJAM202c carries P2 <sub>rm</sub> -Flag-SAMP1, UbaA- <i>Strepll</i>                             | [4]        |
| pJAM1860 | Ap <sup>f</sup> ; Nv <sup>f</sup> ; pJAM202c carries P2 <sub>rm</sub> -Flag-SAMP1, UbaA G39,41A - <i>Strepll</i>                    | This study |
| pJAM1849 | Ap <sup>f</sup> ; Nv <sup>f</sup> ; pJAM202c carries P2 <sub>rm</sub> -Flag-SAMP1, UbaA G42A - <i>Strepll</i>                       | This study |
| pJAM1853 | Ap <sup>f</sup> ; Nv <sup>f</sup> ; pJAM202c carries P2 <sub>rm</sub> -Flag-SAMP1, UbaA D63N - <i>Strepll</i>                       | This study |
| pJAM1845 | Ap <sup>f</sup> ; Nv <sup>f</sup> ; pJAM202c carries P2 <sub>rm</sub> -Flag-SAMP1, UbaA D65N - <i>Strepll</i>                       | This study |
| pJAM1869 | Ap <sup>f</sup> ; Nv <sup>f</sup> ; pJAM202c carries P2 <sub>rm</sub> -Flag-SAMP1, UbaA S70A - <i>Strepll</i>                       | This study |
| pJAM1172 | Ap <sup>f</sup> ; Nv <sup>f</sup> ; pJAM202c carries P2 <sub>rm</sub> -Flag-SAMP1, UbaA N71A - <i>Strepll</i>                       | This study |
| pJAM2708 | Ap <sup>f</sup> ; Nv <sup>f</sup> ; pJAM202c carries P2 <sub>rm</sub> -Flag-SAMP1, UbaA L72P - <i>Strepll</i>                       | This study |
| pJAM1764 | Ap <sup>f</sup> ; Nv <sup>f</sup> ; pJAM202c carries P2 <sub>rm</sub> -Flag-SAMP1, UbaA R74Q - <i>Strepll</i>                       | This study |
| pJAM1164 | Ap <sup>f</sup> ; Nv <sup>f</sup> ; pJAM202c carries P2 <sub>rm</sub> -Flag-SAMP1, UbaA K87R - <i>Strepll</i>                       | This study |
| pJAM1731 | Ap <sup>f</sup> ; Nv <sup>f</sup> ; pJAM202c carries P2 <sub>rm</sub> -Flag-SAMP1, UbaA D131N - <i>Strepll</i>                      | This study |
| pJAM1179 | Ap <sup>f</sup> ; Nv <sup>f</sup> ; pJAM202c carries P2 <sub>rm</sub> -Flag-SAMP1, UbaA R136A - <i>Strepll</i>                      | This study |
| pJAM994  | Ap <sup>f</sup> ; Nv <sup>f</sup> ; pJAM202c carries P2 <sub>rm</sub> -Flag-SAMP1, UbaA C188S - <i>Strepll</i>                      | [4]        |
| pJAM1829 | Ap <sup>f</sup> ; Nv <sup>f</sup> ; pJAM202c carries P2 <sub>rm</sub> -Flag-SAMP1, UbaA C188A - <i>Strepll</i>                      | This study |

|          |                                                                                                               |            |
|----------|---------------------------------------------------------------------------------------------------------------|------------|
| pJAM1722 | Ap <sup>f</sup> ; Nv <sup>f</sup> ; pJAM202c carries P2 <sub>rrm</sub> -Flag-SAMP1, UbaA C171S -Strepll       | This study |
| pJAM1166 | Ap <sup>f</sup> ; Nv <sup>f</sup> ; pJAM202c carries P2 <sub>rrm</sub> -Flag-SAMP1, UbaA C174S -Strepll       | This study |
| pJAM1716 | Ap <sup>f</sup> ; Nv <sup>f</sup> ; pJAM202c carries P2 <sub>rrm</sub> -Flag-SAMP1, UbaA C245S -Strepll       | This study |
| pJAM1726 | Ap <sup>f</sup> ; Nv <sup>f</sup> ; pJAM202c carries P2 <sub>rrm</sub> -Flag-SAMP1, UbaA C248S -Strepll       | This study |
| pJAM1163 | Ap <sup>f</sup> ; Nv <sup>f</sup> ; pJAM202c carries P2 <sub>rrm</sub> -Flag-SAMP1, UbaA C203S -Strepll       | This study |
| pJAM1728 | Ap <sup>f</sup> ; Nv <sup>f</sup> ; pJAM202c carries P2 <sub>rrm</sub> -Flag-SAMP1, UbaA C265S -Strepll       | This study |
| pJAM995  | Ap <sup>f</sup> ; Nv <sup>f</sup> ; pJAM202c carries P2 <sub>rrm</sub> -Flag-SAMP2, UbaA-Strepll              | [4]        |
| pJAM1178 | Ap <sup>f</sup> ; Nv <sup>f</sup> ; pJAM202c carries P2 <sub>rrm</sub> -Flag-SAMP2, UbaA N71A -Strepll        | This study |
| pJAM1743 | Ap <sup>f</sup> ; Nv <sup>f</sup> ; pJAM202c carries P2 <sub>rrm</sub> -Flag-SAMP2, UbaA R74Q -Strepll        | This study |
| pJAM1183 | Ap <sup>f</sup> ; Nv <sup>f</sup> ; pJAM202c carries P2 <sub>rrm</sub> -Flag-SAMP2, UbaA K87R -Strepll        | This study |
| pJAM1717 | Ap <sup>f</sup> ; Nv <sup>f</sup> ; pJAM202c carries P2 <sub>rrm</sub> -Flag-SAMP2, UbaA D131N -Strepll       | This study |
| pJAM1180 | Ap <sup>f</sup> ; Nv <sup>f</sup> ; pJAM202c carries P2 <sub>rrm</sub> -Flag-SAMP2, UbaA R136A -Strepll       | This study |
| pJAM1722 | Ap <sup>f</sup> ; Nv <sup>f</sup> ; pJAM202c carries P2 <sub>rrm</sub> -Flag-SAMP2, UbaA C171S -Strepll       | This study |
| pJAM1166 | Ap <sup>f</sup> ; Nv <sup>f</sup> ; pJAM202c carries P2 <sub>rrm</sub> -Flag-SAMP2, UbaA C174S -Strepll       | This study |
| pJAM996  | Ap <sup>f</sup> ; Nv <sup>f</sup> ; pJAM202c carries P2 <sub>rrm</sub> -Flag-SAMP2, UbaA C188S -Strepll       | [4]        |
| pJAM2758 | Ap <sup>f</sup> ; Nv <sup>f</sup> ; pJAM202c carries P2 <sub>rrm</sub> -Flag-SAMP2, UbaA C188A -Strepll       | This study |
| pJAM1163 | Ap <sup>f</sup> ; Nv <sup>f</sup> ; pJAM202c carries P2 <sub>rrm</sub> -Flag-SAMP2, UbaA C203S -Strepll       | This study |
| pJAM1716 | Ap <sup>f</sup> ; Nv <sup>f</sup> ; pJAM202c carries P2 <sub>rrm</sub> -Flag-SAMP2, UbaA C245S -Strepll       | This study |
| pJAM1726 | Ap <sup>f</sup> ; Nv <sup>f</sup> ; pJAM202c carries P2 <sub>rrm</sub> -Flag-SAMP2, UbaA C248S -Strepll       | This study |
| pJAM1728 | Ap <sup>f</sup> ; Nv <sup>f</sup> ; pJAM202c carries P2 <sub>rrm</sub> -Flag-SAMP2, UbaA C265S -Strepll       | This study |
| pJAM2759 | Ap <sup>f</sup> ; Nv <sup>f</sup> ; pJAM202c carries P2 <sub>rrm</sub> -Flag-SAMP2, UbaA C143S,C188S -Strepll | This study |
| pJAM1865 | Ap <sup>f</sup> ; Nv <sup>f</sup> ; pJAM202c carries P2 <sub>rrm</sub> -Flag-SAMP2, UbaA C174S,C188A -Strepll | This study |
| pJAM1864 | Ap <sup>f</sup> ; Nv <sup>f</sup> ; pJAM202c carries P2 <sub>rrm</sub> -Flag-SAMP2, UbaA C203S,C188A -Strepll | This study |
| pJAM2762 | Ap <sup>f</sup> ; Nv <sup>f</sup> ; pJAM202c carries P2 <sub>rrm</sub> -Flag-SAMP2, UbaA C188S,C248S -Strepll | This study |
| pJAM2763 | Ap <sup>f</sup> ; Nv <sup>f</sup> ; pJAM202c carries P2 <sub>rrm</sub> -Flag-SAMP2, UbaA C188S,C265S -Strepll | This study |
| pJAM1306 | Ap <sup>f</sup> ; Nv <sup>f</sup> ; pJAM202c carries P2 <sub>rrm</sub> -Flag-SAMP3, UbaA-Strepll              | [8]        |
| pJAM1753 | Ap <sup>f</sup> ; Nv <sup>f</sup> ; pJAM202c carries P2 <sub>rrm</sub> -Flag-SAMP3, UbaA N71A -Strepll        | This study |
| pJAM1754 | Ap <sup>f</sup> ; Nv <sup>f</sup> ; pJAM202c carries P2 <sub>rrm</sub> -Flag-SAMP3, UbaA K87R -Strepll        | This study |
| pJAM1736 | Ap <sup>f</sup> ; Nv <sup>f</sup> ; pJAM202c carries P2 <sub>rrm</sub> -Flag-SAMP3, UbaA D131N -Strepll       | This study |
| pJAM1756 | Ap <sup>f</sup> ; Nv <sup>f</sup> ; pJAM202c carries P2 <sub>rrm</sub> -Flag-SAMP3, UbaA C188S -Strepll       | This study |
| pJAM1757 | Ap <sup>f</sup> ; Nv <sup>f</sup> ; pJAM202c carries P2 <sub>rrm</sub> -Flag-SAMP3, UbaA C188A -Strepll       | This study |
| pJAM1737 | Ap <sup>f</sup> ; Nv <sup>f</sup> ; pJAM202c carries P2 <sub>rrm</sub> -Flag-SAMP3, UbaA C171S -Strepll       | This study |
| pJAM1759 | Ap <sup>f</sup> ; Nv <sup>f</sup> ; pJAM202c carries P2 <sub>rrm</sub> -Flag-SAMP3, UbaA C174S -Strepll       | This study |

|          |                                                                                                         |            |
|----------|---------------------------------------------------------------------------------------------------------|------------|
| pJAM1739 | Ap <sup>r</sup> ; Nv <sup>r</sup> ; pJAM202c carries P2 <sub>rm</sub> -Flag-SAMP3, UbaA C245S -StreptII | This study |
| pJAM1738 | Ap <sup>r</sup> ; Nv <sup>r</sup> ; pJAM202c carries P2 <sub>rm</sub> -Flag-SAMP3, UbaA C248S -StreptII | This study |
| pJAM1304 | Ap <sup>r</sup> ; Nv <sup>r</sup> ; pJAM202c carries P2 <sub>rm</sub> -Flag-SAMP1ΔGG, UbaA-StreptII     | This study |
| pJAM1305 | Ap <sup>r</sup> ; Nv <sup>r</sup> ; pJAM202c carries P2 <sub>rm</sub> -Flag-SAMP2ΔGG, UbaA-StreptII     | This study |
| pJAM1308 | Ap <sup>r</sup> ; Nv <sup>r</sup> ; pJAM202c carries P2 <sub>rm</sub> -Flag-SAMP3ΔGG, UbaA-StreptII     | This study |

<sup>a</sup> Ap<sup>r</sup>, ampicillin resistance; Nv<sup>r</sup>, novobiocin resistance; Km<sup>r</sup>, kanamycin resistance; Tet<sup>r</sup>, tetracycline resistance; Cm<sup>r</sup>, chloramphenicol resistance. *Hfx. volcanii* strain NH02 was generated by deletion of *ubaA* from HM1096 by uracil selection and 5-fluoroorotic acid (FOA) counter selection as previously described [3]. *E. coli* TOP10 was used for routine recombinant DNA experiments, and *E. coli* GM2163 was used to prepare plasmid DNA for transformation into *Hfx. volcanii* as previously described [8, 9]. *E. coli* strains were grown at 37 °C in Luria-Bertani medium. PCR-generated DNA fragments encoding the full-length *ubaA* (HVO\_0558) were amplified using Phusion DNA polymerase and cloned into the NdeI-to-BIPI sites of pJAM503 (with an N-terminal His<sub>6</sub>-tag and thrombin-cleavage site, His<sub>6</sub>-) and pJAM809 (with a C-terminal StreptII-tag, -StreptII) to generate pJAM1209 and pJAM957, respectively. These plasmids were used to produce epitope-tagged UbaA in *Hfx. volcanii*. UbaA variants with single-point and combinatorial amino acid exchanges were generated by site-directed mutations using plasmid pJAM957 purified from *E. coli* TOP10 as a template and Pfu Turbo DNA polymerase as described in QuikChange Lightning mutagenesis protocol (Stratagene, La Jolla, CA). PCR products were treated with DpnI (37 °C for 2-3 h), purified using MinElute purification kit (Qiagen) and transformed into *E. coli* XL10-Gold. Other UbaA variants were generated by inverse PCR-based mutagenesis using Phusion DNA polymerase. DpnI-treated PCR amplicons were phosphorylated by T4 polynucleotide kinase and circularized by T4 DNA ligase prior to transformation into *E. coli* TOP10. All pJAM957-derived plasmid constructs were verified by DNA sequencing. For co-expression of UbaA-StreptII proteins with SAMPs that had N-terminal Flag tags (Flag-), the BamHI to BIPI fragment of pJAM957 and pJAM957-derived plasmids (encoding UbaA-StreptII and its variants) was blunt-end ligated into the BIPI site of plasmid pJAM947 (SAMP1), pJAM949 (SAMP2), and pJAM977 (SAMP3). Genes encoding N-terminal Flag-His<sub>6</sub>-SAMPs were cloned in pET24b vector (Km<sup>r</sup>) to generate pJAM1131 (SAMP1), pJAM1132 (SAMP2), pJAM1160 (SAMP3), pJAM1174 (SAMP1ΔGG), and pJAM1175 (SAMP2ΔGG). Expression plasmid pJAM2704 (Flag-His<sub>6</sub>-SAMP3ΔGG) was derived from pJAM1160 truncation using a 3' PCR primer with the appropriate bases deleted. For other details see Materials and Methods.

**Table S3.** List of primers used in this study.

| Primer Pair                                                      | Primer Sequence (5'-3')                                                            | PCR product/<br>description                           | Source or<br>Reference |
|------------------------------------------------------------------|------------------------------------------------------------------------------------|-------------------------------------------------------|------------------------|
| HVO_0558 NdeI FW<br>HVO_0558 KpnI Strep RV                       | 5'-TTCCTTACATATGACGCTCTCACTCGACGCCACCC-3'<br>5'-CCGGTACCGTCGAGGCTGATTGCGCAG-3'     | N-terminal His <sub>6</sub> -<br>tagged UbaA          | [4]                    |
| Hvo_0558 BamHI 500 bp up FW<br>Hvo_0558 HindIII 500 bp dwn<br>RV | 5'-TTATGGATCCCAGAAGTGACTCAGAACGGCGACG-3'<br>5'-CTAAGCTTACGTGGTTCAGGACGGGTGCGGTG-3' | used to confirm<br><i>ΔubaA</i> in generating<br>NH02 | [4]                    |
| Hvo_0558 G39,41A fwd<br>Hvo_0558 G39,41A rev                     | 5'-CGTCGTCGTCGCCGCGGCCGGGTTGG-3'<br>5'-CCAACCCGGCCGCGGCGACGACGACG-3'               | G39,G41A                                              | This study             |
| Hvo_0558 G42A fwd<br>Hvo_0558 G42A rev                           | 5'-GCGTTGGGCGCGCCGGCCATC-3'<br>5'-GCCCGCGCCGACGACGACGAC-3'                         | G42A                                                  | This study             |
| Hvo_0558 D63N fwd<br>Hvo_0558 D63N rev                           | 5'-AACGACGACGTGGTTCGAGCGG-3'<br>5'-GACCACGACGAGTTCGCCGACG-3'                       | D63N                                                  | This study             |
| Hvo_0558 D65N fwd<br>Hvo_0558 D65N rev                           | 5'-AACGTGGTTCGAGCGGAGCAACC-3'<br>5'-GTCATCGACCACGACGAGTTCGCC-3'                    | D65N                                                  | This study             |
| Hvo_0558 S70A fwd<br>Hvo_0558 S70A rev                           | 5'-GCCAACCTCCAGCGGCAGGTC-3'<br>5'-CCGCTCGACCACGTCGTCGTC-3'                         | S70A                                                  | This study             |
| Hvo_0558 N71A fwd<br>Hvo_0558 N71A rev                           | 5'-GAGCGGAGCGCCCTCCAGCGGCAG-3'<br>5'-CTGCCGCTGGAGGGCGCTCCGCTC-3'                   | N71A                                                  | This study             |
| Hvo_0558 L72P fwd<br>Hvo_0558 L72P rev                           | 5'-CGGAGCAACCCCCAGCGGCAGGTC-3'<br>5'-GACCTGCCGCTGGGGGTTGCTCCG-3'                   | L72P                                                  | This study             |
| Hvo_0558 R74Q fwd<br>Hvo_0558 R74Q rev                           | 5'-CAACCTCCAGCAGCAGGTCGTCC-3'<br>5'-GGACGACCTGCTGCTGGAGGTTG-3'                     | R74Q                                                  | This study             |
| Hvo_0558 C174S fwd<br>Hvo_0558 C174S rev                         | 5'-CCCTGCTATCGAAGTCTGTTCCCC-3'<br>5'-GGGGAACAGACTTCGATAGCAGGG-3'                   | C174S                                                 | This study             |
| Hvo_0558 R136A fwd<br>Hvo_0558 R136A rev                         | 5'-TTCCCGACGGCCTATCTCTCAAC-3'<br>5'-GTTGAGGAGATAGGCCGTCGGGAA-3'                    | R136A                                                 | This study             |
| Hvo_0558 K87R fwd<br>Hvo_0558 K87R rev                           | 5'-TGGGGACGCCGAGAGCCGAGAG-3'<br>5'-CTCTCGGCTCTCGGCGTCCCCA-3'                       | K87R                                                  | This study             |
| Hvo_0558 D131N fwd<br>Hvo_0558 D131N rev                         | 5'-CGACGCCTCGAACAACCTTCCCG-3'<br>5'-CGGGAAGTTGTTGAGGCGTCG-3'                       | D131N                                                 | This study             |

|                       |                                         |           |            |
|-----------------------|-----------------------------------------|-----------|------------|
| Hvo_0558 C143S fwd    | 5'-CTCGCTTCGAGGGAATCCCGC-3'             | C143S     | This study |
| Hvo_0558 C143S rev    | 5'-AGACGTCGTTGAGGAGATAGCGC-3'           |           |            |
| Hvo_0558 C171S fwd    | 5'-CGACGGACCCAGCTATCGATGTC-3'           | C171S     | This study |
| Hvo_0558 C171S rev    | 5'-GACATCGATAGCTGGGTCCGTCG-3'           |           |            |
| Hvo_0558 C174S fwd    | 5'-CCCTGCTATCGAAGTCTGTTCCCC-3'          | C174S     | This study |
| Hvo_0558 C174S rev    | 5'-GGGGAACAGACTTCGATAGCAGGG-3'          |           |            |
| Hvo_0558 C188S fwd    | 5'-GTCCCCGACAGCGCGACGACCGGC-3'          | C188S     | [4]        |
| Hvo_0558 C188S rev    | 5'-GCCGGTCGTCGCGCTGTCCGGGAC-3'          |           |            |
| Hvo_0558 C188A fwd    | 5'-GTCCCCGACGCCGCGACGACCGG-3'           | C188A     | This study |
| Hvo_0558 C188A rev    | 5'-CCGGTCGTCGCGGCGTCGGGGAC-3'           |           |            |
| Hvo_0558 C203S fwd    | 5'-CACGGTCGGCAGTATTCAGGC-5'             | C203S     | This study |
| Hvo_0558 C203S rev    | 5'-GCCTGAATACTGCCGACCGTG-3'             |           |            |
| Hvo_0558 C245S fwd    | 5'-CCCGGACAGCCCCGTCTGCG-3'              | C245S     | This study |
| Hvo_0558 C245S rev    | 5'-CGCAGACGGGGCTGTCCGGG-3'              |           |            |
| Hvo_0558 C248S fwd    | 5'-GGACTGCCCCGTCAGCGGCGAGGG-3'          | C248S     | This study |
| Hvo_0558 C248S rev    | 5'-CCCTCGCCGCTGACGGGGCAGTCC-3'          |           |            |
| Hvo_0558 C265S fwd    | 5'-GAGAGCTCCGCAATCAGCCTCGAC-3'          | C265S     | This study |
| Hvo_0558 C265S rev    | 5'-GACGTAGTCGATGTCCTCGATGGAG-3'         |           |            |
| NdeI up Hvo_2177 fwd  | 5'-ATCATATGGAGCTCGAATTACGCTTCTTCG-3'    | SAMP3 ΔGG | This study |
| Hvo_2177 ΔGG BlnI rev | 5'-TTGCTCAGCATCACGCGACCGGCGGGAAGACGC-3' |           |            |

<sup>a</sup>SDM, site-directed mutagenesis. Amino acid exchanges were PCR-based using plasmid pJAM957 as template with either Pfu DNA polymerase as described in QuikChange Lightning mutagenesis protocol (Stratagene, La Jolla, CA) or by inverse PCR with Phusion DNA polymerase (New England Biolabs, Ipswich, MA). See methods for details.

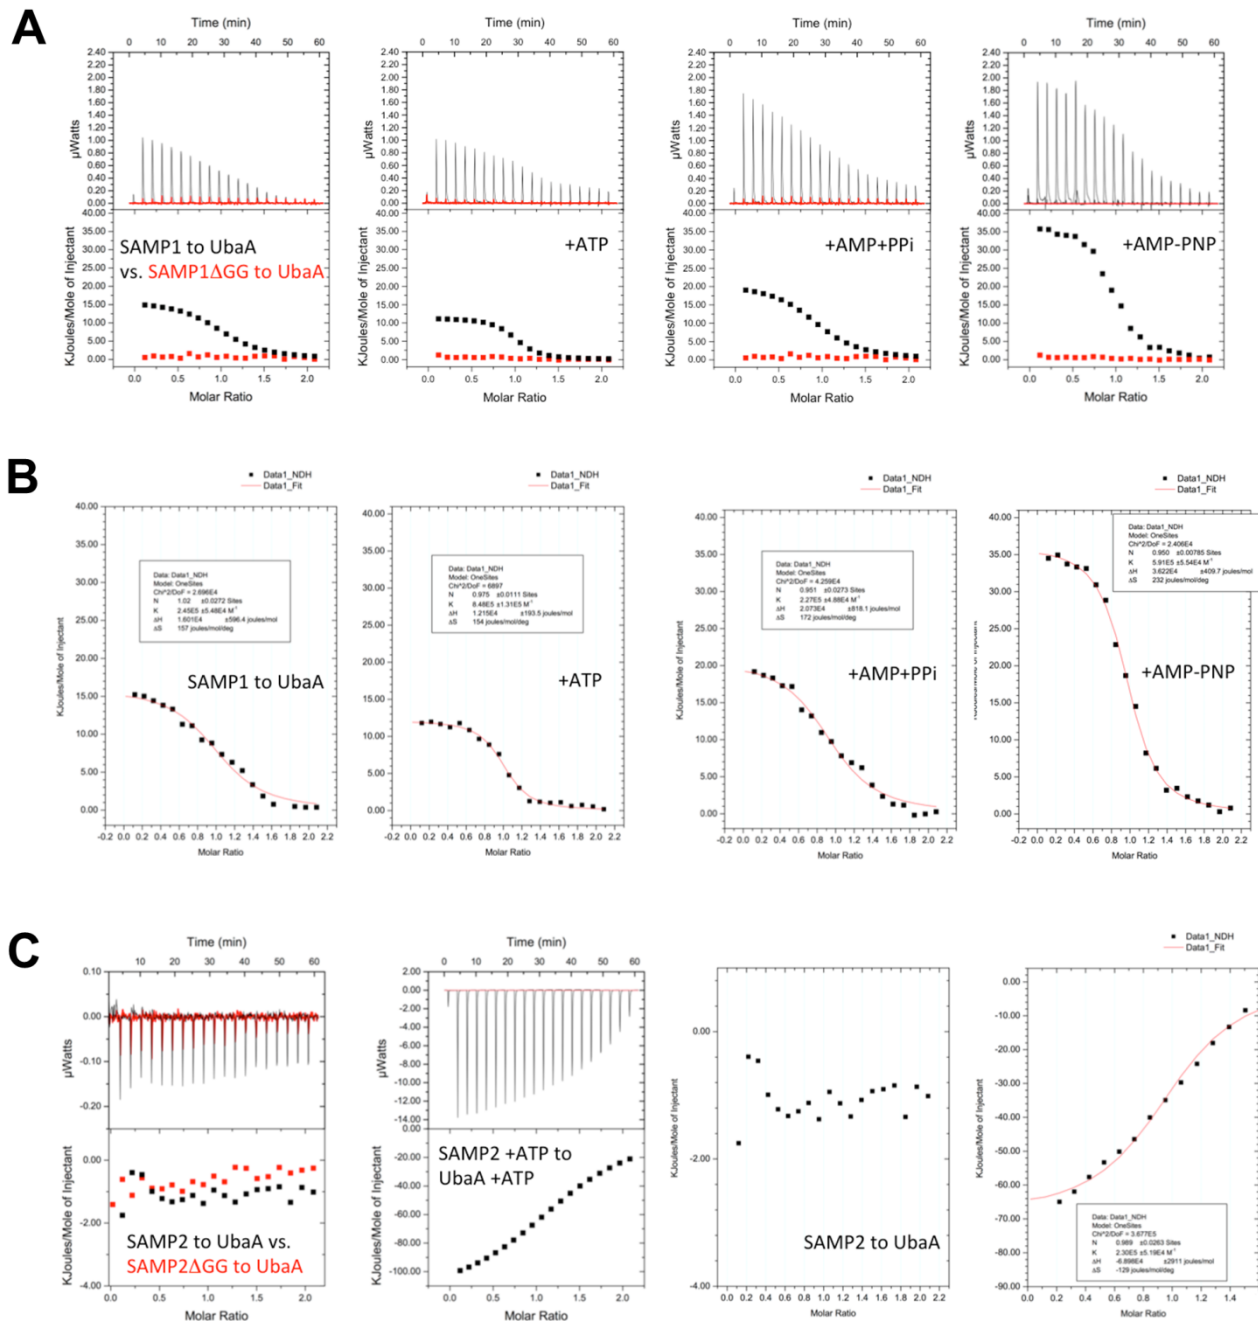

**Figure S1. Raw isothermal titration calorimetry (ITC) data and corresponding enthalpy plots of UbaA:SAMP1/2 binding at 25 °C.** The SAMPs (in syringe) were titrated to UbaA (in cell), with and without ATP, AMP+PPi or AMP-PNP as indicated. (A) From left to right: SAMP1 to UbaA (black) overlaid with SAMP1 $\Delta$ GG to UbaA (red); SAMP1+ATP to UbaA+ATP (black) overlaid with SAMP1 $\Delta$ GG+ATP to UbaA+ATP (red); SAMP1+AMP+PPi to UbaA+AMP+PPi (black) overlaid with SAMP1 $\Delta$ GG+AMP+PPi to UbaA+AMP+PPi (red); and SAMP1+AMP-PNP to UbaA+AMP-PNP (black) overlaid with SAMP1 $\Delta$ GG+AMP-PNP to UbaA+AMP-PNP (red). (B) Background-subtracted enthalpy plots for SAMP1 titrated to UbaA without and with nucleotide ligands, ATP, AMP+PPi and AMP-PNP as indicated from left to right. Here, heat contributions determined from control titrations, namely SAMP1 to buffer, UbaA to buffer and buffer to buffer, were subtracted from the total enthalpy. Data were subsequently fitted to a law of mass action equation, assuming a one-site binding model, and (C) From left to right: raw isothermal titration calorimetry (ITC) data for: i) SAMP2 (black) titrated to UbaA overlaid with SAMP2 $\Delta$ GG (red) titrated to UbaA and ii) SAMP2 to UbaA in the presence of ATP and the corresponding background-subtracted enthalpy plots for iii) SAMP2 to UbaA without ATP and iv) SAMP2 to UbaA with ATP.



## Supplemental References

1. Mullakhanbhai, M. F. & Larsen, H. (1975) *Halobacterium volcanii* spec. nov., a Dead Sea halobacterium with a moderate salt requirement, *Arch Microbiol.* **104**, 207-14.
2. Wendoloski, D., Ferrer, C. & Dyall-Smith, M. L. (2001) A new simvastatin (mevinolin)-resistance marker from *Haloarcula hispanica* and a new *Haloferax volcanii* strain cured of plasmid pHV2, *Microbiology.* **147**, 959-64.
3. Allers, T., Ngo, H. P., Mevarech, M. & Lloyd, R. G. (2004) Development of additional selectable markers for the halophilic archaeon *Haloferax volcanii* based on the *leuB* and *trpA* genes, *Appl Environ Microbiol.* **70**, 943-53.
4. Miranda, H., Nembhard, N., Su, D., Hepowit, N., Krause, D., Pritz, J., Phillips, C., Söll, D. & Maupin-Furlow, J. (2011) E1- and ubiquitin-like proteins provide a direct link between protein conjugation and sulfur transfer in archaea., *Proc Natl Acad Sci U S A.* **108**, 4417-22.
5. Humbard, M. A., Zhou, G. & Maupin-Furlow, J. A. (2009) The N-terminal penultimate residue of 20S proteasome  $\alpha 1$  influences its N<sup>o</sup> acetylation and protein levels as well as growth rate and stress responses of *Haloferax volcanii*, *J Bacteriol.* **191**, 3794-803.
6. Zhou, G., Kowalczyk, D., Humbard, M., Rohatgi, S. & Maupin-Furlow, J. (2008) Proteasomal components required for cell growth and stress responses in the haloarchaeon *Haloferax volcanii*, *J Bacteriol.* **190**, 8096-8105.
7. Prunetti, L., Reuter, C. J., Hepowit, N. L., Wu, Y., Barrueto, L., Miranda, H. V., Kelly, K. & Maupin-Furlow, J. A. (2014) Structural and biochemical properties of an extreme 'salt-loving' proteasome activating nucleotidase from the archaeon *Haloferax volcanii*, *Extremophiles.* **18**, 283-93.
8. Miranda, H. V., Antelmann, H., Hepowit, N., Chavarria, N. E., Krause, D. J., Pritz, J. R., Bäsell, K., Becher, D., Humbard, M. A., Brocchieri, L. & Maupin-Furlow, J. A. (2014) Archaeal ubiquitin-like SAMP3 is isopeptide-linked to proteins via a UbaA-dependent mechanism, *Mol Cell Proteomics.* **13**, 220-39.
9. Dyall-Smith, M. (2009) *The Halohandbook: Protocols for Halobacterial Genetics*, [http://www.haloarchaea.com/resources/halohandbook/Halohandbook\\_2009\\_v7.2mds.pdf](http://www.haloarchaea.com/resources/halohandbook/Halohandbook_2009_v7.2mds.pdf).
